# Supplementary material for: De Novo Transcriptome Analysis of R. nigrum cv. Aldoniai in Response to Blackcurrant Reversion Virus Infection
Source: MDPI journal article supplement (doi:10.3390/ijms23179560), 2022-08-24
Supplement: s1 [file s1]

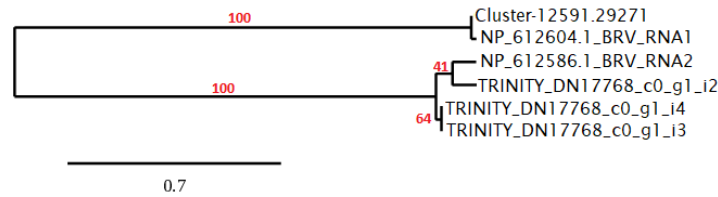

**Figure S1:** Phylogenetic tree of BRV RNAs at amino acid level and Trinity and Cluster sequences (shown in fasta format below) assembled in BRV-inoculated cv. Aldoniai. Accession numbers of sequences NP\_612604.1 and NP\_612586.1 according to NCBI database [7,8]. Phylogenetic analysis was performed using the maximum likelihood method implemented in the PhyML program (online version <http://phylogeny.lirmm.fr/phylo.cgi/index.cgi>); a bootstrap analysis with 100 replications was performed.

### RNA1 sequence in transcriptome of BRV-inoculated cv. Aldoniai

Underlined parts of sequences are translated to amino acids

>Cluster-12591.29271

```

CTTTTGCTCCTCTTTCTCCTTGCTCTTTTATTGATTTTACAATGGTGAAAATTGGTTCCGTCACCCCTCGCTCCC
AAGCAACTGGTTCTTGAGAACAAATATATTGCTGCGTGCTTTCTAGGCCAGCAAATTTTGCTCTTACTTTCTTGCT
CCAGGGTGCTCCTGGAAGCCTAGCGTGCTGCTGCGAGCCATCAATGGTGTCAATGCTGTGACACCACCACCT
TTCAACTCCTGGCGATGGATGGGACTCCCTATCTTTGCGCGCTGCAGCGGTTGTGGTGCGCCAATTTCAATTGGCC
CACAACCGCTTTGTCAAGACTGGCTTGCGCCAGTTTAACAAGGAGTGCACGAGGCGCTGCAACGCCTTCAACCTTAA
GAAAGCTGCTCGCCAGAGCAGTGGACGTAGAGCCGCCTGCAAGCGGATTCTTGCGTCTTTGGATGCAGACCTGCCAT
GTAGCAGGTCTCTCGCAGGGCCATAGTGACGGCCATTATGCTGGAGTGCACACTGCGGCTCGGAAGAGTGTCTCTC
TTCCGCCAATGCGCGCAGACAAGCGCGCATTTAGGGCTTTGGCAGCTGCCATGCAGCCCTTGGTTCTGGCTCCCCC
CACCTGTGCACGCATACCCTATGTGTGCCACTTTCTCTCTGTGGAGGAAAGTGTCTCTGACGCTCTCTTGAGC
GTTGTTCCAAGCGTGTTCCACGCGAACACGCTTCCCCCGGGTTGCATTTGAAATGCAACCTTTGCTGATCGTCCC
CGGCTTTTCTCCCGGGTGTTGCTCCTCCTCTCTCAGAGATAACACGGGCGTTTTTCTCTCGTGTCTTTGTTCTTG
GAGTGCCATGTATGATTGTGCTACTGATCTTGACATGTTGTACTTGATTGGTGGTCCATCACCCCAATGGCACATT
ACTTGGTCATGCTTGACAATTTTCTTGGCACCCCGACTGAAGAAAGTGTGCGACAGGCTTCTACAAATCTTTTAGAG
GAAGTTGAAGCCATGCGTGCTCTTTGTAGAGACCACCGTGCGAACGGTGTGTTTGCTTGGGTGACAGAACTGCTGA
TACGATTGGTAGCACCTAAAGACTGTTGCTGCAGCTCCTTTCCATGGAGTTGGCGTTGCGCTTAAACAGTTTTTAA
CTCCTTGTGCTTCAGCTACTTTAGCGTGGGGGGAAAAATTTTTCCAGACCCTCAAATCCAAATTTTTTGTGTTCTG
AAACCCTACATCCAACATGCTATTTATGCCAGTGCTGAAATTGAAAAATACTGGGCATTTATACATGGTTGGGCCAC
CAAGATGTGGAACAATGTTGGAGTAGAGTTGCAGGCGCTTGGTGATGCTGCATGGTGGGCCATTGGAATTACCATGG
TTTGTGGTATTGTTACCCTCGTTGAAAAGCTCTTAGTTTATCTTGGAGCTTTGAATGCGGGTGGTATATTGTGCTCT
CTAATGCTCACTGGTCTTCTAGGTGCTGCAGGTCTATTGGCGACTGGAAAATTTGCTGAGGCCAGTAGTACTCTTGT
TGGTGCCATGCGTTCTTTGATATTCACATTATTTGGATCATGGAAACCAACGGAGGCCAGTGATGGACTTACTTGCA
ATGCCAATGCTCTTGATTTCCTATTGAAAGTTTTGGAACTGTAGGTACAGGGTTGATATCTGCTCCACTCGGTACA
CTACAGTATATTGGGAAATATGGGCAGGCTATGGACCAAATCCGAAAGGGCAAGGATGCCATCAAAGAGTTTGTGG
ATTCTGCATGGATCGTGTAGCCGATGCTTGGGATTATATGACAGGTAGAAAGGATTCTTTCTGCGTGAAATTGCGT
CCGCTGCAAAGGTTGATATTGTGTATTGGATCAAACAAACACAGAGTGTGCTGCTACAAGCTCAAACAATAGCGGTC
ACTGACATTGTCTTTTGGACACAGTCACCCATTTGTTGTACAAAGGGCAAATACTGCAACTCACTCTTGCCAAGGC
TTCTCGCACAAATCTCTTGATTATGCACGTATTGTAAGTACGCTCATTGGTGAGCTTACAAAAATACGTGCAATAT
GTGCTCGTGCTGGAAGTTTTGATGGTCTGCGCCAGAACCCTTTGGTGCTATATTTACGGTAAGTCCATTGCGGC
AAATCACTGTTTATGGAAGACGTTTCACGCGCTTTGCTTAAAGAGAATGGTCATGCTCCTAATGACATCTATGCGAA
GAATGCGCGTGATAGTTTTTGGTCCGGATATCTGCAGCACGCTTGCCTGCAGATAGATGATCTCTCGGCCTGTGTAA
CTCGACCCTCCCTTGAGTCTGAGTTTTTGCAGCTAGTGGGTTCTAAGATGTATTCCCTGAACATGGCTGCTGTTGAA
GACAAGGGTATGAGTTTTAATAGCTCGATCATTGTACGACAGCAAATGTGTACACTGCTCTCTACTAGCGCAGAAAT
TACTGATAAGGATGCATATGGAAATAGGCGGAATGTGGTAGTGCAGTGTGAGCTGCCCCTGATGTTGAATTTGATC
CGCGCAATCCTTCCGCAAGTTGTGAAGCACGTTTAGTGCATCGCACTGATGAGAGCCCCCTAGGAAATGGGCAGTGG

```

AGAAACTGTTCCGCTGTGCTTGAGGATATCATTACACACGCTGCCGTCCATCGCAACAAAGAGAATCTTCTTATGGA  
GAATTATAGGGAGCGGTCGGACACGCAGCATCCAGTTTTTGTGGGGCTAAAAGCTTTATCCATAGACTTGCAAAGG  
AAAAGAAGCTTTGCTCACATAGTCTGTGATGATGTGCTCTATTACCACGACTCATACATTGATAGTACTCGTGTGTGT  
GAGGGTACCATAAATATTGGCATGGAGGATGCATGTATACAGAGTGTGGTACAGTGGAGTGAATTAGTGGGTGGAGT  
GAAGGACCTTGGTCTTCTCTACGCATTTGTACATGCTTTCACAGAGGGACCATGTCATGTTGATAGTGTGGAAGCTT  
TGAATTCTGAAGCTACGAGTTGTCAGCGAGATTTTTTTCAATCGCTGTCGTTGCTGGAACGCATTTATATGCGACTT  
GTACAAAAACAGCTCGATAGAATTCGGGCTAATCCAGATTTTTTTGTTTTCTGTAGATATTAAGTGTGAATTTCTTC  
AGAGTTTTCCGTCATGGGTATGATGAAATGATTACACATGGCGGGAAGGTGTTGGCCATTTTTGCGGCCCTTCTTTTG  
GTTTTGTTACTTTATTCTTCTTCTTTGCTTTGTATCAGACATTTGTTGCTGGTACTAGTAGTGCCCTTGTGTCTGC  
TGGTATGATAACCCAACTTAGCGCAAATGCTGGTTCGGTCTGCACCTTCTGCGTCGAATCCTTCTGGAGCTGCCTCGT  
ATGTATCGAGTAATATACCCATTACACACAGGTGGCGTTCTAACTACTCTGAGAGATCATATGCGCTCAATTCCAAT  
CTTGAGGATAAATATCTTCTTGATCTTCTCGTGTGGTTACAAATTCCAGGAGATTTCGATAATCTCATGTATCCGTTT  
CAAGGGAAGAAGTTTGCTGCTTACCAAACACCAGGCCCTAGCCATTCTGAGGGGGCCCGTGTATTATTGCAATTACT  
ATGGCCGTGGTGCAGCTGTACAAACAATCCCTCTGTCGTGGAGTTATAAGAAAGTGCCTGAATTTGCGGACACTGAA  
GCGGTTCTTTTCTTGATGCCAGCTTTTCGACAATGCCAGCAGGGCGGGAGCATTATTTCAACGTTCTGTAGAACG  
ATTGCCACAGTATTTGACATGAATGGGGTCGTAATGAAACAGAAGCGTTACATGACGGACTCAGATGATAGCCTTG  
CAGCTTTTACTCCCAATCAACCCGTTGTTAACACATGGGAGAATTCGCGTGCCAAACTCAACTGTGAGCGGCAAGGT  
ATAAATACTTTTTGCTTATGGAGGCAACTATAGAAATGAGCTACCACGCTCTATTTCTTCAAAGTGTAAACACAGTCC  
TGAGGATTGTGGTGCAATTATGACCATGATATTTGAGGGGAGAAGAATTGTCGTTGGCATGCATGTTGCCCTCAGGGA  
AGAACCCTCAAGGTCGCTATATGTCCACAGCATGTTTGCTCCAGATTATCACGAGGACTTGTGCTGAAGTCCATG  
CTTCAATATACACCATATGATGGTATTTGTAAGGAGGGTTACCGACAGATAGGAAATATTGAAAATATTGGTGCAG  
TCCATATACGTCAGGTAAACTGCGTTTGTGGCCGTGCCCAACATCTTTTATATAGTCCTCCGGTGTGCAAGAGA  
AGTTGCCTGGTAGTGCGCAATCTGTCACGATACAGGTTGAGGTGAAACAGCCAGCCATTTTGTCTAAGGATGATCCA  
AGAATACCAGAGGGGACTTCTATGACCTTTGATTGACGGGATGGCCAAATTTTACATCCTATGGCTGTACTTGA  
TGAAAATGTGTGCGATGAAGTTGCACAGGATATAGTCGAATCGTGGCATGATTGCTTCCAAGACTTGCAAGACGTCT  
CTGACGAGATTGCAATAAATGGTTCCACTGAGATGGACTATGAGCCCTTCAATCTTCAATCTTCCGAGGGATATCCT  
TATGTGACTCAACGCAAACCAGGAGAAAGTGGCAAGATCCGTTTTTTTGAATGGATCCCTATACTGGGCTCAAGAG  
TCTCATTCCCAATACACTACCAGCTATGCGCTATGAAGCGTTGCAGCGGGATTGTTTCACTTCCGTTCCAGAAATGG  
TGTGTATAGAGACGCCCAAAGATGAGTGCCTGCCTTTGCGTAAAATTTGTATCAAGCCCAAGACAAGGCTGTTCTCA  
ATCTTGCCATTGGAGTTTAATCTCCTTCTCCGGAAAAAATTTCTCCACTTCTCCTCATCGCTCCAGATGCACCGTGA  
CACCTTCCCCACCCAGGTAGGTGTGAATCCATATTCGAGGGAGTGGGGTGAGCTTTTGCAACGCTTGCGTGCTCAGA  
GCAGCGTTGCTATAAATTGTGATTACGCCAGTTTTGATGGTCTGTTGACTGGTCAAATACTGGAGAAAATAGGTACC  
ATGATCAACAAGATGTATATAGGGTCTGAAGCCTCTAAACTCAGCGTTTAAATTTGCTCATGTCTATTGTGAATAG  
AAAGAGTATATGTGGTGCAGGATTTATGAGGTGAGAGCGGGAATCCCTTCAGGATGTGCGCTGACAGTGTGTTGA  
ATTCCATATTTAATGAGTTTTTGTATCGTTTTTGTATGGAGAACAACCATTATTGGTATTCTCGGGAACGGTTTTCC  
CAATATGTGACATTGTTGATCTATGGTGATGACAATCTCATAGCAGTACACCCCGATTATCTACCTCATTTTAATGG  
GGAAATTATCCGGACGCGTCTCGCTGCCGTTAATGTCGTTATCACAGATGGTAGTGATAAGACTGCCGAGAAAATCG  
AGGAAAAGCCATTGGTTTCAGCTTGACTTTTTGAAACGTCGATTTAGGAAAGTTGAATGATGGTACTGTCTATGCCCA  
CTTGATTTAGCATCGGTTTACACAGTCTCCAAAATGTTACCATGGGAGCTGGCTCTATACATATGGCGTTGCAAAA  
CAACGTCCATAATGCGCTCCTTGAGTTATATCTACACGGCAATGAGACATGGTTTAACCACTTAAGAGATTTCTATA  
GGAAGTCTCATGCGTGGGTAAACCTTCCAAGTTGGCGTGAAGCTTTTGCAATTTACACAGGGACAAATTTACAGGAGTC  
ACACCATGGACTCCCTATCAAATGTTTGACGTTTCTGTGGATGGTGAGCGCTTAGAGCTATGATGGCTAATCAAGG  
GGAAGCGACTTTTTCCACACACTTGGGCAGAGAAATATATATCTGCGGCCCAAAGTGGTGTGTTTCTGACCCAGAAC  
ATCAATTCGTGGTGTCTACTACTCCCTTGAGGAGTGCAGACCGGGGCGAGTGGTATTCACCGGGTTGTTGAATATCCC  
TGTAACGGTGTGGGAAGACTGCCTACACAGGATTGGGTGCGCAAATTTAAGAGCTCCGCGCATAGAGTGACAGCTGA  
AATCAGGAAAGCGCATGCAGGTGGAAGGCGATATATTTTCGCGATGACCCACCGTATGTTGCTAACTGGTGTGCAG  
CTATTGGGTTTGACAGGGTTTGGGTTATGATTATAAATCTATGATTAACTGTACCATGATGTATCTGTGCCAGGA  
TCAGATGCTCTTTATTTTTATTTTTGATCAACGGGCTCGGCGTGCTTTGCTGAACCATATATCCCCCCCCATCTACG  
CACGCGGGCTCGGTAGCCCAATAGTGGGGTTTGTAGATAAATAGCTAGTATCTTACTACTCGGACTCCCTCTGCCG  
TCATAGAGGGGTTTCAAGGGATGTCATCATCAGCGTTGGCTATGTCCGCGATGTGAATCATGGAGTAACGCACCATG  
AGTCCCCGTTAATTCGGTCCCAGAGACTACACTTGGGTTGAAATGATGGTAAACCATCCGTATGGGTCTATGTC  
CATATGTTAAGAGTTGTCTTACTGTATATGGCTTCTACATAAGGTGCGTACCCTGAAATAGGGATCCTGTTGCTT  
GCGTGGTTGTAGAAGTACTAAGTATGGTTGCAACATAAATATGACTTGGGAGACAAAGTCTCATCCACCTTGAAC

GCACAGGGATATAACTCAAAGCGGAATGGTAGTGATCTACTTGCCCTATCAGTAGGGATGGGAACGCTCATTATTAG  
CAAACCCTTACCCTGAACATTAGGTGTCTCAGCAATATGGGACAAAAGGCTAGGGAGAAAGATCCCATGGAAGTGCA  
ATTCTTCTACTCGAGATGGGAGTCATGCCATCGTGTTATTTTATTTTCTTGCCCTTGATTTTCAATTCTAAGAAAGTT  
TCTGGATCTAAACCAGACCCAGGTGAGTGGAACCTTCTGCGTCCACTCGGTTTGGTATTTTACGATTAAAATACCCA  
GGTCTACTGCTTCCGAGCCTGATTAATAATCTTAAAGCGGCCATCGTCCAGTACTTGCTGGCATGGCGACAAGAGTGA  
TGATGCTTTGTGAATCATCAAATAGTTTCTTTGTTTCTATTTCTAGGAAATCCTTTTGGAGAGTGCCTAAGAGAATA  
ACAAAGCGCATAGCACACGATAGAGTGCTATCTCTGTTCCAGGAGATTGAGCCGGAGATATAGTCGGTCGTTTTCACG  
ATCAAGGTATTTCTGGATGGGCCCCGTTGCGAAGGGTTTTTCGCTCAAGGTTTACATGACTGTAAATTGTAAGTGTACT  
CAAGATGTAGCTAGTCTAGGCAACTAGTTACATTGGATGAGGTCCCGATTGATACGGGGGGATAATTAATCCCAGCT  
TACGGTGTGTGCCGACTTGCATGGAAGTGTCCATGCCGCATTTTGTCTGTTTTTAGACATAAATAAGCACTCTTTAC  
TGCGTATAATACGCTGGTGTCTCATTTTATACTAGCGTTGCAGCGCTAGGACTACCTAAGACAACCGTATTTTACGT  
TTGCTTCATTTATTTTTGTTACTCCTGTTTAGCAGGTCGTGCCTTCAGTAAGCACACAAAAATATTTTCCATTTTGA  
GGTTTTGGTTAAGAGTCATTTTATTGAGCACTTTTCTTTTAGAGAATAGAGTCTGAA

>Cluster-12591.29271;orf1 len=1047 frame:3 start:3 end:3143  
sp|Q8V5E0|POL1\_BRAV RNA1 polyprotein OS=Blackcurrant reversion association  
virus OX=65743 PE=3 SV=1

FASSFSLSSFIDFTMVKIGSVTLAPKQLVLENKYIAACLSRPANFALTFLAQGASLKPSVVARAAINGVIACDTTTF  
QLLAMDGTPLSFAAAAVVVRQFQLAHNRFVKTGLRQFNKECTRRCNFNLKKAARQSSGRRAACKRILASLDADLPC  
SRSSRAIVTAHYAGVATAARKSALFRQMRADKRAFRALAAAMQPLVLAPPTCARIPYVCPLSSSVEESVSRRSLER  
CSKRVPREHASPRVAFEMQPFADRPRLF SRVLLLPLSEITRAFFSRVFVPGSAMYDCATDLAHVVLDWWSITPMAHY  
LVMLDNFLGTPTEESVRQASTNLLVEEAMRALCRDHRANGVFAWVTETADTIGSTLKTVAAPFHGVGVALKTVLT  
PCASATLAWGEKFFQTLKSKFFEFLKPYIQHAIYASAEIEKYWAFIHGWATKMWNVGVELQALGDAAWAIGITMV  
CGIVTLVEKLLVYLGALNAGGILCSMLTGLLGAAGLLATGKFAEASSTLVGAMRSLIFTLFGSWKPTEASDGLTCN  
ANALDFPLKVLETVGTGLISAPLGTLYIGKYQAMDQIRKKGDAIKEFVGFCMDRVADAWDYMTGRKDSFLREIAS  
AAKVDIVYWIQTQSVLLQAQTIIVTDIVLLDTVTHLLYKGQILQLTLAKASRTTSLDYARIVSTLIGELTKIRAIC  
ARAGSFDGRRPEPFWCYIYGKSHCGKSLFMEDVSRALLKENHAPNDIYAKNARDSFWSGYLQHACVQIDDLACVT  
RPSLESEFLQLVGSKMYSLNMAAVEDKGMSFNSSIIVTTANVYTAPTSAEITDKDAYGNRRNVVQCRAAPDVEFDP  
RNPSASCEARLVHRTDESPLGNGQWRNC SAVLEDI IHHAHVHRNKENLLMENYRERSDTQHPVVFVGA KSFIHRLAKE  
KNFAHIVCDDVLYYHDSYIDSTRVCEGTINIGMEDACIQSVVQWSELVGGVKDLGLLYAFVHAFTEGPCHVDSVEAL  
NSEATSCQRDFQSLSLLERIYMRLVQQLDRIRANPDFVFVFCRY\*

## RNA2 sequences in transcriptome of BRV-inoculated cv. Aldoniai

Underlined parts of sequences are translated to amino acids

>TRINITY\_DN17768\_c0\_g1\_i3 len=6369 path=[0:0-408 3:409-439 6:440-630 8:631-718 10:719-921 11:922-986 13:987-1032 14:1033-1062 15:1063-1245 17:1246-1281 18:1282-1371 20:1372-1409 22:1410-1629 23:1630-1667 25:1668-2595 26:2596-2600 27:2601-2739 29:2740-2774 30:2775-2905 32:2906-2945 33:2946-3747 35:3748-3788 36:3789-3924 38:3925-3977 40:3978-4374 41:4375-4406 43:4407-4815 44:4816-4850 45:4851-4899 47:4900-4940 49:4941-5057 50:5058-5067 51:5068-6368]

CTTTTCCCTGCTCTTTTCCTTTTCCTTCTAGTTCCTTCTGTTCTGGTTTAAATTGTTGTGGAGTAGGTTTTTCTTGGTC  
TCCTTTGTCTTCCCTCTTTTGCCTCCCTCTTTTCTTCTGATTTTGTGTTGCTTTGAGATGAGCGAGTGTGGAGGT  
GCCACACCCATGTCTGGGTGTGGTAGAATGTGTGCTCTCCGGAGCACCTGGTCAAAAAGGGCCTTCCTTACCGCCTG  
TAAGGATGGTGCCTCACCAGTGATGGTAGGTGTCCGCAGTATGGTTGTGGGGCTCTTGTCTCCATTACCAAGGGTG  
AACAGCAGCCCAAGAGAGCCGTCTCTGCAAAGGTGGCGAAATGCTTGTGCTGGGTCAAACCAGCACGTTGGTGTGAG  
AAACACCAAGTGGGACCTGCAAGTCCCAATGGTTCTGCGGTACCACAAGACCGAGATCTGCGCATGTAGCGCCGGC  
CCCGCTTCCATATAGGAAGCAAACCTTGTGACGTGGTTGTACAGTTGGCCCTCTAGAGCTGGTTTATCCCGCTCTAG  
TTTCTGAGGAGATACCAACTCCTGTGCTGCCACCCGACTAAGGTGGAAGAGGTTCCCATACCGAGCTACCCCTTG  
TGGTTGGCTCCCATGATGGTGGAGCAGCCCTATGCTGCTACCCCAAAGGTCCCCGCCTTACCCAACGGGAAGA  
GTTTGGCTACTTAAAAAGCGCCTTATCCGCAAGGGTAAGATCCTGCAGCGCCGTGCAACACACGCGCTGTGAAG  
CTCGGGCTGCCTTAGTCCGTGTTTCGTGCTGCCACCAACGTAAGGTGGAGGAGGTACCGCCCTTGTGTTGCAAGGGC  
AGGCGCATACTTGGCGCCACCAGTTACTTCATGAAGTGAAGCGGTGGCCCCCTTTCTCAAGCCCAAGAGCATCT  
TGTGGCTTCTTCTTGTGCTGCAGCTGCAGCAGCCAGGAGGAATGCGCTAGCTTCTTTCGCCGCGCCAAGGCGTGGC  
GGAAAAGCATAAGTGCAACTCCCCCTGTTGCTTTTGCCACAGCTGTGGCTTCTAAAGTGGCTTCGGTCACTTTGCC  
TGGGCCCATCTTGGGCTCTCTTTCAGGGACTTTTGGCAGTCCCACTCTTGATGGCACGTTGGGTGCCAAGCAATG  
GTGTGCTAAAACCATTGACAATGGGTGCTGACGCCCATTTGTTTCTTGTGTCCGCTCTGCGCATGACAAAGTGCAGA  
GCTGGCTACATAGCCAACCAGAAGTGGGTGTTATAAATACTAAGGTTCTCTGGTGAATCGGAGGTCAACTTGGAG  
GTTTCATCACCTCTTCTTTATCTGAAGAGATAGTGGATAAACCACGAGAACTAGCCAGAGTGAATCTGGCACCC  
AGAGATGGGTGTAAGAAATATCTACGTTTTCCATGATGATTATGGGAACTAGTCTAGAAGAAGACGAAAAATTTA  
CCTGTACTTATAATCGACGATGTGGTATTCCATATCTGCCGGTTGAAGGATGGGGCGCTGAAGAGCGTAAGAGTACT  
ACCCCGGGATGGAATTTCTCTCTCCATAACAATGAAGAGTTTGAATTTCTTCTAGTCTCTGAAGAGGATTTTACTAA  
GGAAGTGGTTTTTACCAGTCGCTCTTGAAGAGGAGGATAAATATTCCACAGCGAGTAGCAGTGGATTCTTCTCCTTGG  
ACTCGACCACATCTAACATATGCGTGCAGTGTCCAGGGGTTTTGAGTGTGCTGATGCTGATGCCTACTTCTTTGATGGG  
CCGGGCTATCGGTGCTCTTCGCGACCACGCGATTTTCGCTTACCAATTAGGAGAGGTTCTGACTATGAAAGCAGAGT  
CAGAGACTCTATCAAGAGGAAAAGTGAATATCCTTTGCAAGAGCGTTTTTACCAGTGTACTGAGGGAGAAGAGGAAAA  
AGAAACACAAGAAAGAGTTTTATTCTTCTCAGCATGCTTCGCTTTCAAGAGGAAGCAAATACAGTGGTCTCCACACA  
GTCAACAAGATGTTTAATGATTGGGAGGACTATTGCGTTGCATCGGCATGGTTGCCTTTTGAAGTTGTTGTGACAGA  
CGAAATTGAGAATGTCACACCTTTGTGTTCCAGTGGAGAGGATCACAATTGTAATAGTAGAGCGCCTTACCCGTTGG  
CTCCAGTGTGACGAAGTATTGTGACGATACTTGTTTTCATCCTAACGATGGGTGGACAACCTGATGGGAATGGTAAA  
CATTTCCGACTTAGTCCCTCGTTTCGTTTTACCTGAAGTCCCATAACCAATAGTACAACGCACCACACACCGGTGTGC  
GCAGTTTCTGCAAGATTGGGGTATTTATGATCTCACCTGTAATTCAGGCTTCAAGCTGAAAATTCACAGAGTGAGA  
TTCAGGAACGGATGGAAGATCGTGGTGAAGAGAAGCCGGTACCAAGCTTAGATATTCTTATTAAGAACTTTCAAAG  
AGGAATACTAAGGTAAAGGGTGCAGGCGAAAATCGCTATGCTGATCGTCATAGTCTAACTGAAAAGGCTATTTTCCA  
CCAGCCCGGTGCGCTGAGCCGCATGCGCTCGGGTAAGGAAAAAACTATTGTGGCAGCGAATCACAACCTCTGACCAGA  
TTTCTGTACGCATGGCAGAATGCGGTAAACCCGTGTTTACACCATTTGCCTCGGATGTCTGATGAAATGCTCAGAAGA  
TTTCTCGAGAAAGGGTTGGGTTCTACTTCTACAGTGGCATTGGATATTGGCATACAAAGTCATATTCCACAGGGAAT  
GCCTACTGTTGCGTTTGTGAATGTTATGGATACACGATTGAGGATCCTTTATATTCTTCTTTGTGTGGTTTCTTACA  
TTGATCTTGAAGGGATCGGGCAAAAACGCTATGTTTACCCTTGTCAATTTCCCGATGAGCAAATTAGCAGAGGAT  
GTTGATGATGTGTTAAATGGCTTGATGCTATGCACACATTTTCAAGATTCCACTAAATTTGGAGTTGGCAAACCTGC  
TTTCCAATATGGCACGCTAGAATTTCAAGAATTTAAGCCATCTGCCTACTCGGATTTTTCCCGAGTTTCAGATAATT  
GGGATGCGATCGAAAACAACAGAATACACCAATGATCGCATATTAGCAGGATTCTCTGTTCTTGGCGCTGTTTCA  
CAAGCTTATAACCAAGCTCTGCCAGTTTTTAAATCTGTGGAGCTTGTGGCACCGCCACGAGAAAGCCAGTAGTAGC  
TACCTATCAAAATCCAACCTACATTGGGTAGGAGTAGCACAACACGTAGTTTCCGCATGCCTACTTTGGATTTGCCGC

GGAGCACGGGGCGTGATGCTTCAATTCTATAGTGCATCGGCGTAATAACAATGATGCACATGGATTTGATGAGGCT  
ACACCAGCTCGTTTTTCAACATGTGACTCTGGATTGGTGGCTGACACCACGCTTGCATTTGCAAAGATGTATCAATG  
CAAAAAAGATGCTAAAGCGGGGCATGTATTGGCCACTATTGATATCCAGAAATGTGTATTTGAAGACAATAGACGAG  
TGGCTCTGGATTGGCTAGCACACGGTCTTGCTAGTTTTTCAATATGATCTACAATTGACCGTAGGGTCGAACCCCTTT  
GTTGGGGTAACCTTGGGGATTACAGTAGACGCTTTTCGACCGGCTTCTGCCCCAGATTTCTGATGAGGTGATTGCGGT  
GCCTTTGGCATTTCAACTGCCAACTTTTTTGTTCCTCAATTTCAAAGAAGGGAACCTTCACTCAAACATTGATTTTTG  
CGGCAATAGCTGGGTATAATTTTTTCCGCATGTAGCAGCTTTTGGTCGGCCGAAAATTATCGTGTATATAGTGTCC  
GATAATGATTTGCCAGCAAGTGACACATGGATGTGCCTTGTGCGAGTTACACATGACTAGACTGGAAGCATCCACATT  
AGCTTGTAGTCCACCCTCATTTTTGCCTCAAGCATTGGGGGTGATTTACCTTTAGATTTGTGGCGTGGCCCATATA  
CTTTTCCATTAGGGGGAGGTACCAAACGATTGTCTACTTTCGTTGGATATTGGGCGGTGCGACAACGACCGTTAGTGGG  
TGGCGCACTGTTTCTTTTCCAGCTGCCTATGCTCTTTTCTTACAAGGGCATGGTGGTAGTCTTGTGGTGAAGTAGT  
GCATACTGGCTCAGCAGCTGTGTCTTGTGCTCTTCATCTTTGCATTTCTTTTGGTGGTGTCTCTCTACTTTGGAGG  
AAGCACTTGTTTTTCTGGTTTTTCGCTTACCTTCCGGTGAAGGCAAGTTTCATATCAAGGTACAGACGCCATATGGG  
CGTTTAAAGCACTTTAACTCCAGACTGTGCCTTATATGTTTACTTAGCTGGAGGACCCATAGCCGTTGCACCCATGTC  
GGTGGCCTACCAATTCTGTATCCACTTGGAGAGGTTGGTAGACGATGGAGCCCCCTCCTCGGACCATTGGTTTTGATTC  
GAGAGTTTAAATTGGGCTACCATAAATAATTTCAAAGTGATGACATTACGTTTGCTATTCCCGCGCGTTTTGTCTGAT  
CTTGTGTTGACTTGTGGAGATGTAACCATGAGCACTAACCTCTTGCCCTACTGATTGGTAGTTGTGGCTTTTTTCCG  
AGGTAATCTTACGGTTGTCTTAGAATGGGCCACCTTTTTGAAGGCAGGAGATAAGGAGGGTACAGTACAGTTGACCA  
CGTGTCTGGCATGATCAATAATGTCAAGGGTGC GCGGAATGCCATTCAAAGAAGGTTGTCAACTTGTCCCTCGTC  
GGATCTATCTCACGTTACCTCAATGTTGGGGATTTACCGGTTTTGCACAATCTGGTGGACAAGTGGGATATGATGA  
AATTTTCTCGAGTTTACGACGAATAAAGCTAAACAGATCCGCTATCTGAATATAAATGTTGAACTCGATGAAAATT  
TCGAGCTGTATGGTCGCACGGTTATACCTCTCAAAAATACAGCTCCCGCTCTCGCAAGCACATCTGCTAGCGCTCCC  
AACACAAGTTGATAGCGATGTGTCCGTTTAGGAGATGAATAGCTAGTATCTTACTACTCGGATTCCCTCTGCCGTC  
ATAGAGGGGTTTTCAAGGGATGTCATCATCAGCGTTGGCTATGTCCGCGATGTGAATCATGGAGTAACGCACCATGAG  
TCCCCGTTAATTCGGTCCCAGAGACTACACTTGGGTTGAAAATGATGGTAAACCATCCGTATGGGTCTATGTCCA  
TATGTTAAGAGTTGTCTTACTGTATATGGCTTCTACATAAGGTCGGTACCCCTGAAATAGGGATCCTGTTTCGCTTGC  
GTGGTTGTAGAAGTACTAAGTATGGTTGCAACATAAATATGACTTGGGAGACAAAGTCTCATCCACCTTGAACCGC  
ACAGGGATATAACTCAAAGCGGAATGGTAGTGATCTACTTGCCCTATCAGTAGGGATGGGAACGCTCATTATTAGCA  
AACCTTACCCTGAACATTAGGTGTCTCAGCAATATGGGACAAAAGGCTAGGGAGAAAGATCCCATGGAAGTGCAAT  
TCTTCTACTCGAGATGGGAGTCATGCCATCGTGTTATTTTTATTTTCTTGCCCTGTATTTCAATTCTAAGAAAGTTTC  
TGGATCTAAACCAGACCCAGGTGAGTGGAACCTTCTGCGTCCACTCGGTTTGGTATTTTACGATTAAAATACCCAGG  
TCTACTGCTTCCGAGCCTGATTTAAATCTTAAAGCGGCCATCGTCCAGTACTTGTGGCATGGCGACAAGAGTGATG  
ATGCTTTGTGAATCATCAAATAGTTTCTTTGTTTCTATTTCTAGGAAATCCTTTTGGAGAGTGCCTAAGAGAATAAC  
AAAGCGCATAGCACACGATAGAGTGCTATCTCTGTTCCAGGAGATTGAGCCGGAGATATAGTCGGTCGTTTACGAT  
CAAGGTATTTCTGGATGGGCCCCTTGCGAAGGGTTTTCGCTCAAGGTTACATGACTGTAAATTGTAAGTGTACTCA  
AGATGTAGCTAGTCTAGGCAACTAGTTACATTGGATGAGGTCCCGATTGATACGGGGGGATAATTAATCCAGCTTA  
CGGTGTGTGCCGACTTGCATGGAAGTGTCCATGCCGCATTTTGCTTGTTTTTAGACATAAATAAGCACTCTTTACTG  
CGTATAATACGCTGGTGTCTCATTTTATACTAGCGTTGCAGCGCTAGGACTACCTAAGACAACCGTATTTTACGTTT  
GCTTCATTTATTTTTGTTACTCCTGTTTAGCAGGTCGTGCCTTCAGTAAGCACACAAAAATATTTTCCATTTTTAGG  
TTTTGGTTAAGAGTCATTTTATTGAGCACTTTTCTTTTAGAGAATAGAGTCTGAA

>TRINITY\_DN17768\_c0\_g1\_i3 len=1626

VFLGLLCLPSFALPSFSSDFVCFEMSECGGATPMSCGRMCALRSTWSKRAFLTACKDGALTS DGRCPQYGC GALVS  
ITKGEQ QPKRAVSAKVAKCLCWVKPARWCEKHQVGPASPNGSAVTT RPRSAHVAPAPLPYRKQ TCDVVVTVGPLELV  
YPALVSEEIPTPVAATPTKVEEVPIPELPLWLAPTWMVEQPYAATPKVPRLTQREEFALLKKRLIRKGKILQRRATH  
ARCEARAALVRVRAATQRKVEEVTALVAKGRRILAAHQLLHELEAVAPLSQAQ EHLVASSCAAAAARQEECASFLRR  
AKAWRKSISATPPVAFATAVASKVASVTL PWAHLGLSLQGLLAVPTLDGTLGAKQWCAKTI AQWVVTPIVSCVRS AH  
DKVQSWLHSQPEVGVINTKVPLVQSEVNLEVSSPLSLSEEIVDKPRETSQSGIWHPEMGVRNIYVFHDDSWETSLEE  
DEKFTCTYNRRCGIPYLPVEGWGAERKSTTPGWNFSLHNNEEFELPSPEEDFTKELVLPVALEEDKYSTASSSG  
FFSLDSTTSNICVQCPGVLSADADAYFFDGPYRCSRPRDFRLPIRRGSDYESRVRDSIKRKSENPLQERFTTVLR  
EKRRKKHKHKEFYFSACFAFKRKQIQWSPTVNKMFNDWEDYCVASAWLPFEVVVTDEIENVTPLCSSGEDHNCNSRA  
PYPLAPVSTKYCDDTCFHPNDGWTTDGNKGHFR LSPSFVLPEVPIPIVQRTTHRCAQFLQDWGIYDLTCNSSLQ AEN

SQSEIQERMEDRGEKPVPSLDILIKKLSKRNTKVKGAGENRYADRHSLTEKAIFHQPGALSRMRSGKEKTIVAANH  
NSDQISVRMAECGKPVFTPLPRMSDEMLRRFLEKGLGSTSTVALDIGIQSHIPQGMPTVAFVNVMDTRIEDPLYSSL  
CGSYIDLGRDRAKTLCLPLVNFPM SKLAEDVDDVLNGLMLCTHFQDSTKFGVGKPAFYGTLEFQEFKPSAYSDFSR  
VRDNWDIAIAKQONTPNDRILAGFSVLGAVSQAYNQALPVFKSVELVAPPTRKPVVATYQNPTTLGRSSTTRSFRMPT  
LDLPRSTGRDASIPIVHRRNNND AHGFDEATPARFSTCDSGLVADTTLAF AKMYQCKKDAKAGHV LATIDIQKCVFE  
DNRRVALDWLAHGLASFQYDLQLTVGSNPFVGVTLGITVDAFDRLLPQISDEVI AVPLAFQLPTFLFPISKKGFTFTQ  
TIDFAAIAGYNFFPHVAAFGRPKIIVYIVSDNDLPASDTWMCLVELHMTREASTLACSPTLILPQAFGGDLPLDLW  
RGPYTFPLGGGTKRLSTSLDIGRSTTTVSGWRTVSFPAAYALFLQGHGSLVGEVVHTGSAAVSCALHLCISFGGAP  
PTLEEALVFPGFRLPSGEGKFHIKVQTPYGRSLTLTPDCALYVYLAGGPIAVAPMSVPYQFCIHLERLVDDGAPRRT  
IGLIREFNWATINNFKSDDITFAIPARLSDLVLT CGDVTMSTNPLALLIGSCGFFRGNLTVVLEWATFLKAGDKEGT  
VQLTTCRGMINN VKARNIAIQKKVVNLSLVGSISRYLNVGDFTGFAQSGGQVGYDEIFLEFSTNKAKQIRYLNINVE  
LDENFELYGRTVIPLKNTAPALASTSASAPNTS\*

>TRINITY\_DN17768\_c0\_g1\_i4 len=6369 path=[0:0-408 3:409-439 6:440-630 8:631-  
718 10:719-921 11:922-986 13:987-1032 14:1033-1062 15:1063-1245 17:1246-1281  
18:1282-1371 20:1372-1409 22:1410-1629 23:1630-1667 25:1668-2595 26:2596-2600  
28:2601-2739 29:2740-2774 31:2775-2905 32:2906-2945 34:2946-3747 35:3748-3788  
37:3789-3924 38:3925-3977 39:3978-4374 41:4375-4406 42:4407-4815 44:4816-4850  
46:4851-4899 47:4900-4940 48:4941-5057 50:5058-5067 51:5068-6368]

CTTTTCCCTGCTCTTTCTTTTCTTTCTAGTTCCTTCTGTTCTGGTTTAATTGTTGTGGAGTAGGTTTTCTTGGTC  
TCCTTTGTCTTCCCTCTTTTGCCTCCCCTCTTTTCTTCTGATTTTGTGCTTTGAGATGAGCGAGTGTGGAGGT  
GCCACACCCATGTCTGGGTGTGGTAGAATGTGTGCTCTCCGGAGCACCTGGTCAAAAAGGGCCTTCCTTACCGCCTG  
TAAGGATGGTGCCTCACCAGTGATGGTAGGTGTCCGCAGTATGGTTGTGGGGCTCTTGTCTCCATTACCAAGGGTG  
AACAGCAGCCCAAGAGAGCCGTCTCTGCAAAGGTGGCGAAATGCTTGTGCTGGGTCAAACCAGCACGTTGGTGTGAG  
AAACACCAAGTGGGACCTGCAAGTCCCAATGGTTCTGCGGTACCACAAGACCGAGATCTGCGCATGTAGCGCCGGC  
CCCGCTTCCATATAGGAAGCAAACCTTGTGACGTGGTTGTACAGTTGGCCCTCTAGAGCTGGTTTATCCCGCTCTAG  
TTTCTGAGGAGATACCAACTCCTGTGCTGCCACCCGACTAAGGTGGAAGAGGTTCCCATACCGGAGCTACCCCTTG  
TGGTTGGCTCCCATGATGGTGGAGCAGCCCTATGCTGCTACCCCAAAGGTCCCCCGCCTTACCCAACGGGAAGA  
GTTTGCCTACTTAAAAAGCGCCTTATCCGCAAGGGTAAGATCCTGCAGCGCCGTGCAACACACGCGCGCTGTGAAG  
CTCGGGCTGCCTTAGTCCGTGTTTCGTGCTGCCACCAACGTAAGGTGGAGGAGGTACCGCCCTTGTGCCAAGGGC  
AGGCGCATACTTGCCGCCCACAGTTACTTCATGAAGTGAAGCGGTGGCCCCCTTTCTCAAGCCCAAGAGCATCT  
TGTGGCTTCTTCTTGTGCTGCAGCTGCAGCAGCCAGGAGGAATGCGCTAGCTTCCTTCGCCGCGCCAAGGCGTGGC  
GGAAAAGCATAAGTGAACCTCCCCCTGTTGCTTTTGCCACAGCTGTGGCTTCTAAAGTGGCTTCGGTCACTTTGCCC  
TGGGCCCCTCTTGGGCTCTCTTGCAGGGACTTTTGGCAGTCCCCACTCTTGATGGCACGTTGGGTGCCAAGCAATG  
GTGTGCTAAAACCATTCACAATGGGTGCTGACGCCCATTTGTTTCTTGTGTCCGCTCTGCGCATGACAAAGTGCAGA  
GCTGGCTACATAGCCAACCAGAAGTGGGTGTTATAAATACTAAGGTTCTCTGGTGCAATCGGAGGTCAACTTGGAG  
GTTTCATCACCTCTTTCTTTATCTGAAGAGATAGTGGATAAACCACGAGAACTAGCCAGAGTGGAATCTGGCACCC  
AGAGATGGGTGTAAGAAATATCTACGTTTTCCATGATGATTATGCGGAACTAGTCTAGAAGAAGACGAAAAATTTA  
CCTGTACTTATAATCGACGATGTGGTATTCCATATCTGCCGGTTGAAGGATGGGGCGCTGAAGAGCGTAAGAGTACT  
ACCCCGGGATGGAATTTCTCTCTCCATAACAATGAAGAGTTCGAATTTCTTCTAGTCTGAAGAGGATTTTACTAA  
GGAAGTGGTTTTACCAGTCGCTCTTGAAGAGGAGGATAAATATTCCACAGCGAGTAGCAGTGGATTCTTCTCCTTGG  
ACTCGACCACATCTAACATATGCGTGCAGTGTCCAGGGGTTTTGAGTGCTGATGCTGATGCCTACTTCTTTGATGGG  
CCGGGCTATCGGTGCTCTTCGCGACCACGCGATTTTCGCTTACCAATTAGGAGAGGTTCTGACTATGAAAGCAGAGT  
CAGAGACTCTATCAAGAGGAAAAGTGAAAATCCTTTGCAAGAGCGTTTTTACCAGTGTACTGAGGGAGAAGAGGAAAA  
AGAAACACAAGAAAGAGTTTTATTCTTCTCAGCATGCTTCGCTTTCAAGAGGAAGCAAATACAGTGGTCTCCCACA  
GTCAACAAGATGTTTAATGATTGGGAGGACTATTGCGTTGCATCGGCATGGTTGCCTTTTGAAGTTGTTGTGACAGA  
CGAAATTGAGAATGTCACACCTTTGTGTTCCAGTGGAGAGGATCACAATTGTAATAGTAGAGCGCCTTACCCGTTGG  
CTCCAGTGTGACGAAGTATTGTGACGATACTTGTTTTCATCCTAACGATGGGTGGACAACCTGATGGGAATGGTAAA  
CATTTCCGACTTAGTCCCTCGTTTCGTTTTACCTGAAGTCCCCATACCAATAGTACAACGCACCACACACCGGTGTGC  
GCAGTTTCTGCAAGATTGGGGTATTTATGATCTCACCTGTAATTCAAGCCTTCAAGCTGAAAATTCACAGAGTGAGA  
TTCAGGAACGGATGGAAGATCGTGGTGAAGAGAAGCCGGTACCAAGCTTAGATATTCTTATTAAGAACTTTCAAAG  
AGGAATACTAAGGTAAAGGGTGCAGGCGAAAATCGCTATGCTGATCGTCATAGTCTAACTGAAAAGGCTATTTTCCA

CCAGCCCGGTGCGCTGAGCCGCATGCGCTCGGGTAAGGAAAAAACTATTGTGGCAGCGAACCATAACTCTGATCAGA  
TTTCCGTACGCATGGCGGAATGTGGTAAGCCCATATTACACCATTACCTCGGATGTCTGATGAAATGTTGAGAAAA  
TTTTTGGAAAAAGGGTTAGGTTCCACTTCTACAGTGGCGTTGGACATTGGCATACAAAGTCATATTCCACAGGGAAT  
GCCAACTGTTGCGTTTTTAAATGTTATGGACACACGCATTGAGGATCCCTTGTATTCTTCTTTGTGTGGTTCCCTACA  
TAGATCTTGGAAGGGATCGGGCTAAAACGCTTTGTTTACCTCTTGTCAACTTTCCATTGAGCAAATTAGCAGAGGAT  
GTTGATGATGTGTTAAATGGTTTAAATACTGTGTACACATTTTCAAGATTCTACTAAATTTGGAGTTGGTAAGCCTGC  
TTTCCAATATGGCACTTTGGAGTTTCAGGAATTTAAGCCATCTGCCTATTTCGGACTTTTCCCGTGTTTCGAGATACTT  
GGGACGCGATCGCTAAACAACAGAACACACCTAACGATCGTGTTTTAGCAGGATTTTCTGTTCTCGGTGCTGTGTCA  
CAAGCGTATAATCAAGCTTTGCCGGACTTCAAGTCTATCGAAGTTGTGGCACCACCTAAGAGGAAGCCTATTGTGGC  
TACTTATCAAAATCCAACCTACATTGGTGAGGAGCAATACCACCCGTAGCTTCCGCATGCCTACTATGGAATTGCCAC  
GAAGTACGGGACGTGATACTCCCATTCCTATAGTGCATCGGCGTAACAACAATGATGCAAGTGGATTTGATGAAGCC  
ACACCAGCTCGTTTTCTCAACTTGTCAATCTGGACTTGTGGCTGACACTACGCTCGCTTTTGC AAAGATGTATCAATG  
CAAGAAAGATGCCAAGGCGGGACATGTGTTGGCCACTGTTGATATTTCAGACATGTGTCTTTGAGGACAATAGACGAG  
TGGCTCTTGATTGGCTAGCACACGGTCTTGCTAGTTTTCAAATATGATTTACAATTGACCGTGGGGTTCGAACCTTTTC  
GTAGGGGTAACCTCTGGGGATTACAATAGATGCTTTTCGACCGGCTTCTACCCCAAATTTCTGATGAGGTGATTGCAGT  
GCCATTGGCGTTCCAGTTGCCTACTTTTTTTGTTCCCAATCTCTAAGAAGGGGACTTTCACTCAAACCTATTGATTTTG  
CGGCAATAGCTGGGTACAATTTTTTTTCCGCATGTAGCAGCATTGGTTCGGCCAAAAATTATCGTGTATATAGTGTCA  
GATAATGATTTGCCAGCAAGTGATACGTGGATGTGCCTTCTCGAGTTACATATGACACGATTGGAATCATCCACTTT  
AGCTTGTAGTCCACCCTCATTTTTGCCTCAAGCATTGGGGGTGATTTACCCCTAGATTTGTGGCGTGGTCCATATA  
CCTTTCCATTAGGGGGAGGTACCAAGCGCATATCTACTTCGTTAGATATTGGACGGTCAACAACGACTGTTAGTGGA  
TGGCGCACTGTTTCTTTTCTGCTGCCTATGCCTTGTTCTTACAGGGGCATGGTGGTAGTTTAGTTGGTGAGGTAGT  
GCATACTGGCTCGGCTGCTGTGTGCTGTGCTCTTACCTTTGTATATCTTTTGGTGGTGCTCCCCCTACTCTAGAGG  
AAGCACTTGTTTTTCTGTTTTTCGGCTACCTTCCGGTGAAGGCAAGTTTCATATTAAGGTACAGACGCCCTATGGG  
CGCTTGAGCACTTTAACTCCTGACTGTGCCTTGATGTCTACTTAGCTGGAGGACCTATTGCTGTTGCACCCATGTCT  
GGTGCCCTACCAATTCTGCATCCATCTGGAGAGATTGGTAGATGATGGAGCCCCCTCCTCGAACCATTGGCTTGATTCT  
GAGAGTTTAACTGGGCTACCATAAATAATTTTAAAGAGTGATGACATATCCTTTGCCATTCCGGCACGTTTGTCTGAT  
CTTGTGCTCACTTGTGGTGATGTGACCATGAGTGTCAACCCTCTTGCTTGTTAATTGGCAGTTGTGGTTTTCTTCCG  
GGGCAATCTTACAGTTGTTCTGGAATGGGCTACATTTCTAAAGGCGGGGGATAAGGAGGGGCACAGTTCAATTGACTA  
CGTGTCTGGTGATGATTAAACAATGTTAAGGGTGTGCGTAGTGCCATCCAAAAGAAGGTTGTCAATCTATCACTTGTT  
GGATCTATCTCACGATATCTCAACGTTGGAGATTTCACTGGCTTTGCACAATCTGGTGGACAAGTGGGATATGATGA  
GATTTTTCTCGAGTTTAGCACGAATAAGGCTAAGCAAATTCGATATTTAAATATAAATGTTGAACTCGATGAAAATT  
TCGAGCTGTATGGGCGTACTGTGATACCATTGAAAAATACAGCTCCCGTTCTCGCAAGCACATCAGCTAGTGTCTCC  
AACGAAAGTTGATAGCGATGTGTACACCTTGGAGTTAAATAGCTAGTATCTTTCTACTCGGATTCCCCTCTGCCGTC  
ATAGAGGGGTTTTCAAGGGATGTCATCATCAGCGTTGGCTATGTCCGCGATGTGAATCATGGAGTAACGCACCATGAG  
TCCCCCGTTAATTCCGTCCCAGAGACTACACTTGGGTTGAAAATGATGGTAAACCATCCGTATGGGTCTATGTCCA  
TATGTTAAGAGTTGTCTTACTGTATATGGCTTCTACATAAGGTCGGTACCCCTGAAATAGGGATCCTGTTTCGCTTGC  
GTGGTTGTAGAAGTACTAAGTATGGTTGCAACATAAATATGACTTGGGAGACAAAGTCTCATCCACCTTGGAAACCGC  
ACAGGGATATAACTCAAAGCGGAATGGTAGTGATCTACTTGCCCTATCAGTAGGGATGGGAACGCTCATTATTAGCA  
AACCCTTACCCTGAACATTAGGTGTCTCAGCAATATGGGACAAAAGGCTAGGGAGAAAGATCCCATGGAAGTGCAAT  
TCTTCTACTCGAGATGGGAGTCATGCCATCGTGTTATTTTTATTTTCTTGCTTGTATTTCAATTCTAAGAAAGTTTT  
TGGATCTAAACCAGACCCAGGTGAGTGGAACCTTCTGCGTCCACTCGGTTTTGGTATTTTACGATTAAAATACCCAGG  
TCTACTGCTTCCGAGCCTGATTAATAATCTTAAAGCGGCCATCGTCCAGTACTTGTGGCATGGCGACAAGAGTGATG  
ATGCTTTGTGAATCATCAAATAGTTTTCTTTGTTTTCTATTTCTAGGAAATCCTTTTGGAGAGTGCCTAAGAGAATAAC  
AAAGCGCATAGCACACGATAGAGTGCTATCTCTGTTCCAGGAGATTGAGCCGGAGATATAGTCGGTCGTTTTACGAT  
CAAGGTATTTCTGGATGGGCCCCTTGCGAAGGGTTTTCTGCTCAAGGTTTACATGACTGTAAATTGTAAGTGTACTCA  
AGATGTAGCTAGTCTAGGCAACTAGTTACATTGGATGAGGTCCCGATTGATACGGGGGGATAATTAATCCAGCTTA  
CGGTGTGTGCCGACTTGCATGGAAGTGTCCATGCCGCATTTTGCTTGTTTTTAGACATAAATAAGCACTCTTACTG  
CGTATAATACGCTGGTGTCTCATTTTTATACTAGCGTTGCAGCGCTAGGACTACCTAAGACAACCGTATTTTACGTTT  
GCTTCATTTATTTTTGTTACTCCTGTTTAGCAGGTGCTGCCTTCAGTAAGCACACAAAAATATTTTCCATTTTTAGG  
TTTTGGTTAAGAGTCATTTTATTGAGCACTTTTCTTTTAGAGAATAGAGTCTGAA

>TRINITY\_DN17768\_c0\_g1\_i4

VFLGLLCLPSFALPSFSSDFVCFEMSECGGATPMSGCGRMCALRSTWSKRAFLTACKDGALTSDGRCPQYGCALVS  
ITKGEQQPKRAVSAKVAKCLCWVKPARWCEKHQVGPASPNGSAVTTTRPSAHVAPAPLPYRKQTCDDVVVTVGPLELV  
YPALVSEEIPTPVAATPTKVEEVPIPELPLWLAPTWMVEQPYAATPKVPRLTQREEFALLKKRLIRK GKILQRRATH  
ARCEARAALVRVRAATQRKVEEVTALVAKGRRILAAHQLLHELEAVAPLSQAQEHVASSCAAAAARQEECASFLRR  
AKAWRKSISATPPVAFATAVASKVASVTLPPWAHLGLSLQGLLAVPTLDGTLGAKQWCAKTIAQWVVTPIVSCVRS  
AHDKVQSWLHSQPEVGVINTKVPLVQSEVNLEVSSPLSLSEEIVDKPRETSQSGIWHPEMGVRNIYVFHDDSWETSLEE  
DEKFTCTYNRRCGIPYLPVEGWGAERKSTTPGWNFSLHNNEEFELPSPEEDFTKELVLPVALEEDDKYSTASSSG  
FFSLDSTTSNICVQCPGVLSADADAYFFDGPYRCSRPRDFRLPIRRGSDYESRVRDSIKR KSENPLQERFTTVLR  
EKRRKKHKKEFYFSACFAFKRKQIQWSPTVNKMFNDWEDYCVASAWLPFEVVVTDEIENVTPLCSSGEDHNCNSRA  
PYPLAPVSTKYCDDTCFHPNDGWTTDGNKGHFR LSPSFVLPEVPIPIVQRTTHRCAQFLQDWGIYDLTCNSSLQ  
AENSQSEIQERMEDRGEKPVPSLDILIKKLSKRNTKVKGAGENRYADRHSLTEKAIFHQPGALSRMRSGKEKTIVA  
ANHNSDQISVRMAECGKPIFTPLPRMSDEMLRKFLKGLGSTSTVALDIGIQSHIPQGMPTVAFLNVM  
DTRIEDPLYSSLCGSYIDLGRDRAKTLCLPLVNFPLSKLAEDVDDVLNGLILCTHFDSTKFGVGKPAFQYGTLEFQ  
EFKPSAYSDFSRVRDWDIAIAKQONTPNDRVLAGFSVLGAVSQAYNQALPDFKSIELVAPPKRKPIVATYQNP  
TTLVRSNTTRSFRMPTMELPRSTGRDTPPIVHRRNNNDASGFDEATPARFSTCQSGLVADTTLAFAKMYQCK  
KDAKAGHV LATVDIQTCVFE DNRRVALDWLAHGLASF KYDLQLTVGSNPFVGVTLGITIDAFDRLLPQISDE  
VIAVPLAFQLPTFLFPI SKKGTFTQTIDFAAIAGYNFFPHVAAFGRPKIIVYIVSDNDLPASDTWMCLLELHM  
TRLESSTLACSPTLILPQAFGGDLPLDLWRGPYTFPLGGGTKRISTSLDIGRSTTTVSGWRTVSFPAAYAL  
FLQGHGSLVGEVVHTGSAAVSCALHLCISFGGAPPTLEEALVFPGRFLPSGEGKFHIKVQTPYGR LSTLT  
PDCALYVYLAGGPIAVAPMSVPYQFCIHLERLVDDGAPRTIGLIREFNWATINNFKSDDISFAIPARLS  
DLVLTCDGVTMSVNPLALLIGSCGFFRGNLTVVLEWATFLKAGDKEGT VQLTTCRGMINNVKGVRS  
AIQKKVVNLSLVGSI SRYLNVGDFTGFAQSGGQVGYDEIFLEFSTNKAKQIRYLNINVELDENFELYGR  
TVIPLKNTAPVLASTSASAPNES\*

>TRINITY\_DN17768\_c0\_g1\_i2 len=6360 path=[1:0-402 3:403-433 5:434-624 8:625-  
712 9:713-915 11:916-980 12:981-1026 14:1027-1056 16:1057-1239 17:1240-1275  
19:1276-1365 20:1366-1403 21:1404-1620 23:1621-1658 24:1659-2586 26:2587-2591  
27:2592-2730 29:2731-2765 30:2766-2896 32:2897-2936 33:2937-3738 35:3739-3779  
36:3780-3915 38:3916-3968 40:3969-4365 41:4366-4397 43:4398-4806 44:4807-4841  
45:4842-4890 47:4891-4931 49:4932-5048 50:5049-5058 51:5059-6359]

ACTTTTCCACCTCTTTCTTGTCATTTTTCTAATCTTCTTCCCTCCAGTTAGTATTGACCGATTGTTTGTCTTTTCC  
TTTCATCTCTCTCTCTTTCTTCTGTTGTGGGGTTGCCTTTTGGTTTTCTCCCTATGAGTGATTGTGGTGGTACCACA  
CCCATGCCTGGGTGTGGGAGAATGTGTGCTCTCAAGAGCATCTGGTCCCGAAGGGCCTTCCTTGCTGCCTGCAAGGA  
TGGCGCACTTACCTCTGATGGTAGGTGTCCACAATATGGTTGTGGGGTTCTTGTCCTCCATTACCAAGGGTGTACAGC  
AGCCCAAGAAAACCGCTTCTGCAAAGCGGTAAAATGCTTGTGCTGGGTTCACCCAGCACGCTGGTGCGAAAAGCAT  
CAAAAGGGGCCTGCAAGCCCCAATGGTTCTGCGGTACCCACAAGACCGAAGTCTGCGCATGTAGCGCCAGCCCCGCT  
TCCTTACAAGAAGCAGATTTGTGACGTGGTGGTCACAGTTGGGCCTCTAGAGTTGGTTTATCCAGCTCTAGTTTCTG  
GGGAGACACCAGCTCCCATCGCTGCCACCCCGATTGAGGTGGAAGAGGTTCCCATACCGGAGCTGCCCTTGTGGTTA  
GCTCCGGCGTGGATGGTGGAGCAGCCCTATGCTGCTACCCCAAAGGTCCCCCGCCTTACCCAACGGGAAGAGTTTGC  
GCTACTTAAAAAGCGCCTTACCCGTAAGGGTAAGCTTATACAACGCCGTGCCACGCACGCGCTTTTGTGGCCCGGG  
CTACATTGGCCCGTGTCCGTGCTGCCACCCAACGTAAGGTGGACGAGATTACCGCCCTTGTGTCAAGGGTAGGCGG  
ATTTTGGCCGCCCACCAACTCCTTCGTGAGTTGGAAGAGGTAACCCCTCTCTCTCAAGCCCAAGAACAACTTGTGGC  
TTCTTCTTGTGCTGCAGCTGCAGCACGCCAGGAGGAATGCGCTAGCTTCCTTCGCCGTGCCAAAGCATGGCGGAGGA  
GCATTAGTGCAACTCCTCCTGTTGCCTTTGCCACAGCTGTGGCTTCTAAAGTGGCTACGGCCACCATGCCTTGGGCT  
CATCTTGGGCTCTCTCTTGGGGGACTTTTGGCAGTCCCAACTTTGGATGGCACTCTGGGTGCCAAGCAATGGAATGC  
TAAAACCATTGCTACATGGGTGTAAAACCTATTGTTTCTGTATCCGTTCTGCACATAACAAAGTGCGGGACTGGT  
TACGTAGTCAACCAGAAGTGGGTGTTATAAATACTAAGTTTCTTCAGTGCAACTGGAGGTCTGCTCGGAGGTTTCA  
TTACCTCCCTTGTTATCTGAAGAGATAGTGGATAAACACAAGAACTAGCCAGAGCGGAATCTGGCACCCAGAGAT  
GGGTGTAAGAAATATCTATGTTTTTACGATGATTCTGTGGGAACTAGTCCAGAAGAGGACGATAAATTTACCTATA  
CTTTTAGTCGACAATGTGGTATTCCATATTTGCCGGTTGAGGGTTGGGGCGCTGAAGAGCGTAAGAGTACTATTCTT  
GGTTGGGATTTCCCTCTCTATGATGGAGAGTTTGAATCTTTCCAGTCCTGAAGAGGATAATACTAAGGAAGTGGT  
TTTGCCAGTCGCTCTTGAAGAGGAGGATAAATATTCCACAGCAAGTAGCAGTGGATTCTTCTCCCTGAACTCCATTG



TGTCTGATATATATGCAGATTGTTTCAGGGGTTGTGAGCACCAGGACTTGCGCCCGTTTTTCGTGACGGAACAGGTTTT  
CGGGGCTTTTCGCGACCACGTGATTTTCGCCACCTATAAAGAGGAGCTCAGACTATGAAAGTAAAGTCAGAGCTTC  
AATTCAAAGGAAGGTTGAAAATCCCTTGCAAGAACGCTTTACCACTGTGGTAAGAGAGAAGCGGAAGAAGAAGCAAA  
AGAAAGAATTTTATTCCTTCTCAGCTTATTTTCGCTTTTAAAGGAAGCAGATACAGTGGCCTCCCTCAGCTAGTAAA  
ATGTTTAAATGAATGGGAGGATTATTGCGTTGCAGCGGCGTGGTTGCCTTTTGAAGTTGTAGTGACAGACGAAATTGA  
GAATGTCACTCCTTTGTGCTCCGGTGGAGGAGATCACAATTGTAATAGTAGACCACCTCGCCCGTTGGCTCCATTGT  
CAACGGTTTTCTGTGATAGTTTCGTGTTTTTCATCCTAATGACGGGTGGACGACTGGAGAAAATGGGAAACATTTTCGA  
CTTGGTCCCTCGTTTCGTTTTTACCCGAACCCCCCATACCAATAGTGCACCGCGTTGCACGCCAATGCGCGCAGCTCTG  
TCAAGATTGGGGTATTGGTGATCTCACTTGCAATTCAGGCTACCAAGCTGACAATTTGCAGGGAGAGATTCAAGAAC  
GGATGGAAGATCGCGGTGAAGAAAAACCAGTGCCGAGTCTAGACACTCTTATTAAGAAACTTTTGAAGAGGAGTGCT  
AAGGTTAAAGGTGCAGGTGAAAATCGATACGCCGATCGTCACAGTCTAACCAGAGAAGGCTATTTTCCACCAACCTGG  
AGCGTTGAGCCGCATGCGTTTCAGGTAAAGAAAAAACTATTGTGGCGGCGAATCACAACCTCTGACCAGATTTCTGTAC  
GCATGGCAGAATGCGGTAAACCCGTGTTACACCATTGCCTCGGATGTCTGATGAAATGCTCAGAAGATTTCTCGAG  
AAAGGGTTGGGTTCTACTTCTACAGTGGCATTGGATATTGGCATACAAAGTCATATTCCACAGGGAATGCCTACTGT  
TGCGTTTGTGAATGTTATGGATACACGTATTGAGGATCCTTTATATTCTTCTTTGTGTGGTTCTTACATTGATCTTG  
GAAGGGATCGGGCAAAAACGCTATGTTTACCCCTTGTCATTTCCCGATGAGCAAATTAGCAGAGGATGTTGATGAT  
GTGTTAAATGGCTTGATGCTATGCACACATTTTCAAGATTCCACTAAATTTGGAGTTGGCAAACCTGCTTTCCAATA  
TGGCAGCTAGAATTTCAAGAATTTAAGCCATCTGCCTACTCGGATTTTTTCCCGAGTTTCGAGATAATTGGGATGCGA  
TCGCAAAACAACAGAATACACCAAATGATCGCATATTAGCAGGATTCTCTGTTCTTGGCGCTGTTTCAAGCTTAT  
AACCAAGCTCTGCCAGTTTTTAAATCTGTGGAGCTTGTGGCACCGCCACGAGAAAGCCAGTAGTAGCTACCTATCA  
AAATCCAACCTACATTGGGTAGGAGTAGCACAACACGTAGTTTCCGCATGCCTACTTTGGATTGCGCGGAGCACGG  
GGCGTGATGCTTCAATTCCTATAGTGCATCGGCGTAATAACAATGATGCACATGGATTGATGAGGCTACACCAGCT  
CGTTTTTCAACATGTGACTCTGGATTGGTGGCTGACACCACGCTTGCAATTTGCAAAGATGTATCAATGCAAAAAAGA  
TGCTAAAGCGGGGCATGTATTGGCCACTATTGATATCCAGAAATGTGTATTTGAAGACAATAGACGAGTGGCTCTGG  
ATTGGCTAGCACACGGTCTTGCTAGTTTTCAATATGATCTACAATTGACCGTAGGGTGAACCCCTTTGTTGGGGTA  
ACCTTGGGGATTACAGTAGACGCTTTCGACCGGCTTCTGCCCCAGATTTCTGATGAGGTGATTGCGGTGCCTTTGGC  
ATTTCAACTGCCAATTTTTTTGTTCCCAATTTCAAAGAAGGGAACTTTCACTCAAACCTATTGATTTTGCGGCAATAG  
CTGGGTATAATTTTTTCCGCATGTAGCAGCTTTTGGTTCGGCCGAAAATTATCGTGTATATAGTGTCCGATAATGAT  
TTGCCAGCAAGTGACACATGGATGTGCCTTGTGAGTTACACATGACTAGACTGGAAGCATCCACATTAGCTTGTAG  
TCCCACCCTCATTTTGCCTCAAGCATTTGGGGGTGATTTACCTTTAGATTTGTGGCGTGGCCCATATACTTTTCCAT  
TAGGGGGAGGTACCAAACGATTGTCTACTTCGTTGGATATTGGGCGGTGACAACGACCGTTAGTGGGTGGCGCACT  
GTTTCTTTTCCAGCTGCCTATGCTCTTTTCTTACAAGGGCATGGTGGTAGTCTTGTGTTGGAAGTAGTGCATACTGG  
CTCAGCAGCTGTGTCTTGTGCTCTTCATCTTTGCATTTCTTTTGGTGGTGTCTCTCCTACTTTGGAGGAAGCACTTG  
TTTTTCTCGGTTTTTCGCTTACCTTCCGGTGAAGGCAAGTTTCATATCAAGGTACAGACGCCATATGGGCGTTTTAAGC  
ACTTTAACTCCAGACTGTGCCTTATATGTTTACTTAGCTGGAGGACCCATAGCCGTTGCACCCATGTGCGGTGCCCTA  
CCAATTCTGTATCCACTTGGAGAGGTTGGTAGACGATGGAGCCCCCTCCTCGGACCATTGGTTTGATTTCGAGAGTTTA  
ATTGGGCTACCATAAATAATTTCAAAGTGATGACATTACGTTTGCTATTCCCGCGCGTTTGTCTGATCTTGTGTTG  
ACTTGTGGAGATGTAACCATGAGCACTAACCCTCTTGCCCTACTGATTGGTAGTTGTGGCTTTTTTCCGAGGTAATCT  
TACGGTTGTCTTAGAATGGGCCACCTTTTTGAAGGCAGGAGATAAGGAGGGTACAGTACAGTTGACCACGTGTCTGTG  
GCATGATCAATAATGTCAAGGGTGCGCGGAATGCCATTCAAAGAAGGTTGTCAACTTGTCCCTCGTCGGATCTATC  
TCACGTTACCTCAATGTTGGGGATTTACCGGTTTTTGCACAATCTGGTGGACAAGTGGGATATGATGAAATTTTCTT  
CGAGTTTCAGCACGAATAAAGCTAAACAGATCCGCTATCTGAATATAAATGTTGAACTCGATGAAATTTTCGAGCTGT  
ATGGTGCACGGTTATACCTCTCAAAAATACAGCTCCCGCTCTCGCAAGCACATCTGCTAGCGCTCCCAACACAAGT  
TGATAGCGATGTGTCCGTTTAGGAGATGAATAGCTAGTATCTTACTACTCGGATTCCCCTCTGCCGTATAGAGGGG  
TTTCAAGGGATGTCATCATCAGCGTTGGCTATGTCCGCATGTGAATCATGGAGTAACGCACCATGAGTCCCCCGTT  
AATTCGGTCCCGAGAGACTACACTTGGGTTGAAAATGATGGTAAACCATCCGTATGGGTCTATGTCCATATGTTAAG  
AGTTGTCTTACTGTATATGGCTTCTACATAAGGTGGTACCCCTGAAATAGGGATCCTGTTTCGCTTGCCTGGTTGTA  
GAAGTACTAAGTATGGTTGCAACATAAATATGACTTGGGAGACAAAGTCTCATCCACCTTGAACCGCACAGGGATA  
TAACTCAAAGCGGAATGGTAGTGATCTACTTGCCCTATCAGTAGGGATGGGAACGCTCATTATTAGCAAACCCCTTAC  
CCTGAACATTAGGTGTCTCAGCAATATGGGACAAAAGGCTAGGGAGAAAGATCCCATGGAAGTGCAATTCTTCTACT  
CGAGATGGGAGTCATGCCATCGTGTTATTTTATTTTCTTGCTTGTATTTCAATTCTAAGAAAGTTTCTGGATCTAA  
ACCAGACCCAGGTGAGTGGAACCTTCTGCGTCCACTCGGTTTGGTATTTTACGATTAATAATACCCAGGTCTACTGCT  
TCCGAGCCTGATTAAAATCTTAAAGCGGCCATCGTCCAGTACTTGCTGGCATGGCGACAAGAGTGATGATGCTTTGT

GAATCATCAAATAGTTTCTTTGTTTCTATTTCTAGGAAATCCTTTTGGAGAGTGCCTAAGAGAATAACAAAGCGCAT  
AGCACACGATAGAGTGCTATCTCTGTTCCAGGAGATTGAGCCGGAGATATAGTCGGTCGTTTCACGATCAAGGTATT  
TCTGGATGGGCCCCGTTGCGAAGGGTTTTCGCTCAAGGTTACATGACTGTAAATTGTAAGTGTACTCAAGATGTAGC  
TAGTCTAGGCAACTAGTTACATTGGATGAGGTCCCGATTGATACGGGGGATAATTAATCCCAGCTTACGGTGTGTG  
CCGACTTGCGATGGAAGTGTCCATGCCGCATTTTGCTTGTTTTTAGACATAAATAAGCACTCTTTACTGCGTATAATA  
CGCTGGTGTCTCATTTTATACTAGCGTTGCAGCGCTAGGACTACCTAAGACAACCGTATTTTACGTTTGCTTCATTT  
ATTTTTGTTACTCTGTTTAGCAGGTCGTGCCTTCAGTAAGCACACAAAAATATTTTCCATTTTGTAGGTTTTGGTTA  
AGAGTCATTTTATTGAGCACTTTTCTTTTAGAGAATAGAGTCTGAA

>TRINITY\_DN17768\_c0\_g1\_i2

PIVCLFLSSLSSVVGLPFGFLPMSDCGGTTPMPGCGRMALKSIWSRRAFLAACKDGALTSDGRCPQYGCGLVLP  
ITKGVQQPKKTASAKAVKCLCWVQPARWCEKHQKGPASPNGSAVTTTRPKSAHVAPAPLPYKKQICDVVVTVGPLELV  
YPALVSGETPAPIAATPIEVEEVPIPELPLWLAPAWMVEQPYAATPKVPRLTQREEFALLKKRLTRKGKLIQRRATH  
ARFVARATLARVRAATQRKVDEITALVVKGRRILAAHQLLRELEEVTPLSQAQEQLVASSCAAAAARQEECASFLRR  
AKAWRRSISATPPVAFATAVASKVATATMPWAHLGLSLGGLLAVPTLDGTLGAKQWNAKTIATWVVKPIVSCIRSAH  
NKVRDWLRSQPEVGVINTKVPSVQLEVCSEVSLPPLLSEIIVDKPQETSQSGIWHPEMGVRNIYVFHDDSWETSPEE  
DDKFTYTFSRQCGIPYLPVEGWGAERKSTILGWDFPLYDGEFEFFPSPEEDNTKELVLPVALEEEDKYSTASSSGF  
FSLNSIVSDIYADCSGVVSTRTCARFRDGTGFRGFSRPRDFRPPIKRSSDYESKVRASIQRKVENPLQERFTTVVRE  
KRKKKQKKEFYFSAYFAFKRKQIQWPPSASKMFNEWEDYCVAAAWLPFEVVVTDEIENVTPLCSSGGDHNCNSRPP  
RPLAPLSTVFCDS SCFHPNDGWTGENGKHFRLGPSFVLPEPPIPIVHRVARQCAQLCQDWGIGDLTCNSGYQADNL  
QGEIQERMEDRGEKPVPSLDTLIKLSKRSKVKGAGENRYADRHSLTEKAIFHQPGALSRMRSGKEKTIVAANHN  
SDQISVRMAECGKPVFTPLPRMSDEMLRRFLEKGLGSTSTVALDIGIQSHIPQGMPTVAFVNVM DTRIEDPLYSSLC  
GSYIDLGRDRAKTLCLPLVNFPM SKLAEDVDDVLNGLMLCTHFDQSTKFGVGKPAFYGTLEFQEFKPSAYSDFS RV  
RDNWDIAIAKQQNTPNDRILAGFSVLGAVSQAYNQALPVFKSVELVAPPTRKPVVATYQNPTTLGRSSTTRSFRMPTL  
DLPRSTGRDASIPVHRRNNND AHGFDEATPARFSTCDSGLVADTTLAF AKMYQCKKDAKAGHVLATIDIQKCVFED  
NRRVALDWLAHGLASFQYDLQLTVGSNPFVGVTLGITVDAFDRLLPQISDEVI AVPLAFQLPTFLFPI SKKGFTQT  
IDFAAIAGYNFFPHVAAFGRPKIIVYIVSDNDLPASDTWMCLVELHMTREASTLAC SPTLILPQAFGGDLPLDLWR  
GPYTFPLGGGTKRLSTSLDIGRSTTTVSGWRTVSFPAAYALFLQGHGGS LVGEVVHTGSAAVSCALHLCISFGGAPP  
TLEEALVFPGFRLPSGEGKFHIKVQTPYGR LSTLTPDCALYVYLAGGPIAVAPMSVPYQFCIHLERLVDDGAPPTI  
GLIREFNWATINNFKSDDITFAIPARLS DLVLTCGDVTMSTNPLALLIGSCGFFRGNLTVVLEWATFLKAGDKEGTV  
QLTTCRGMINNVKGARNAIQKKVNL SLVGSISRYLNVGDFTGFAQSGGQVGYDEIFLEFSTNKAKQIRYLNINVEL  
DENFELYGRTVIPLKNTAPALASTSASAPNTS\*
